# Supplementary material for: In situ sulfur-doped graphitic carbon nitride nanosheets with enhanced electrogenerated chemiluminescence used for sensitive and selective sensing of l-cysteine
Source: Royal Society of Chemistry journal article supplement (doi:10.1039/c9tb00301k), 2019-01-01
Supplement: c9tb00301k1.pdf [file c9tb00301k1.pdf]

**In situ sulfur-doped graphitic-like carbon nitride nanosheets with enhanced  
electrogenerated chemiluminescence and their application for selective sensing of  
L-cysteine**

Ruifeng Zhu,<sup>a</sup> Yuhua Zhang,<sup>a</sup> Xian Fang,<sup>a</sup> Xiaoqing Cui,<sup>a</sup> Jing Wang,<sup>a</sup> Chaochao Yue,<sup>a</sup>

Wenhui Fang,<sup>a</sup> Hong Zhao,<sup>\*a</sup> Zengxi Li<sup>\*a</sup>

*<sup>a</sup>School of Chemical Sciences, University of Chinese Academy of Sciences, 19A*

*YuQuan Road, Beijing 100049, China*

*\*Email - hongzhao@ucas.ac.cn*

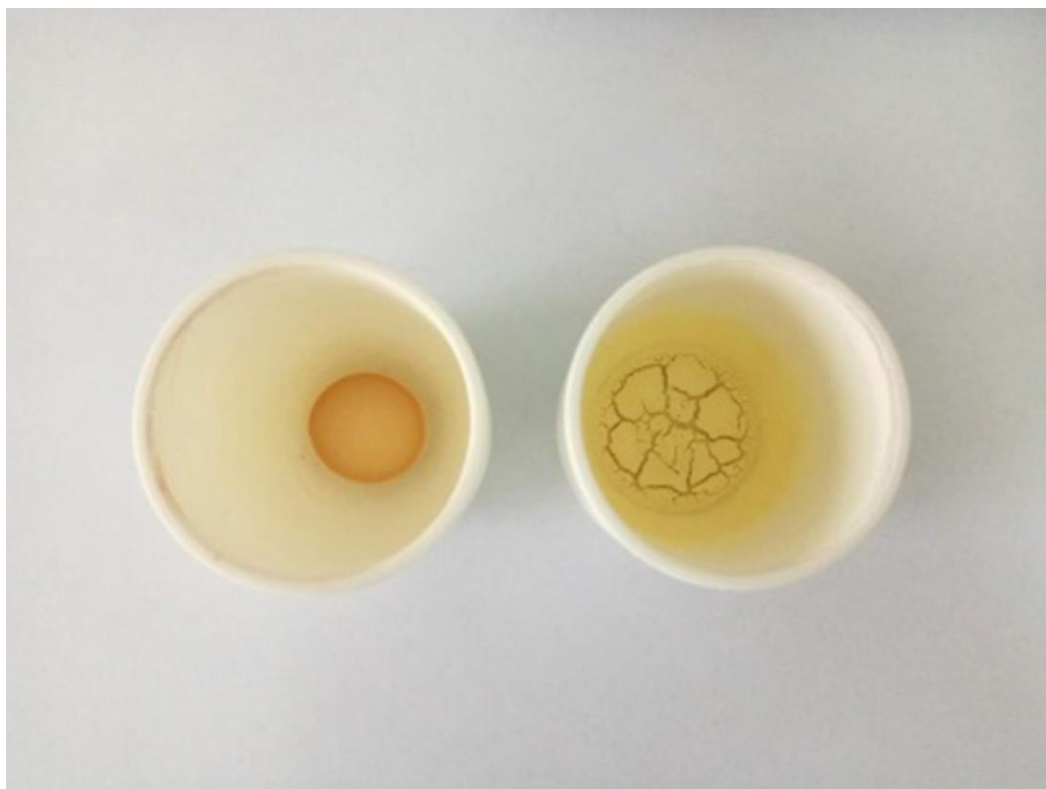

**Fig. S1** The images of bulk S-g-C<sub>3</sub>N<sub>4</sub> NSs (left) and g-C<sub>3</sub>N<sub>4</sub> NSs (right).

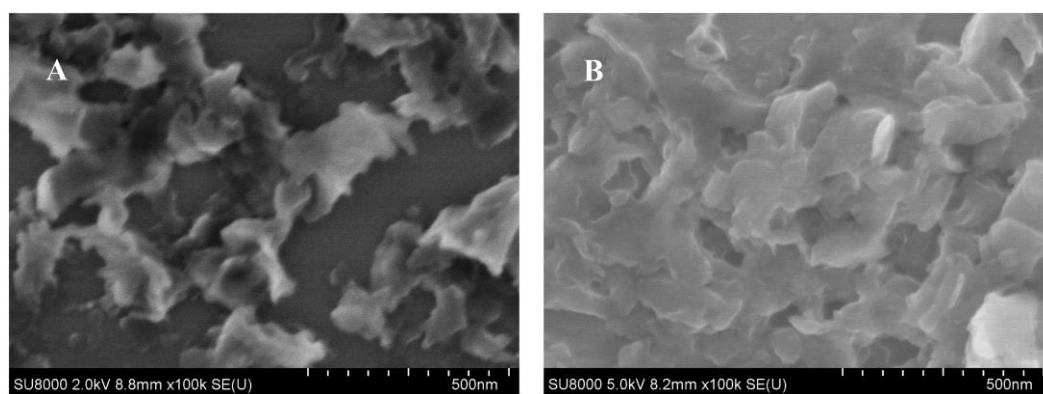

**Fig. S2** SEM images of (A) S-g-C<sub>3</sub>N<sub>4</sub> NSs and (B) g-C<sub>3</sub>N<sub>4</sub> NSs.

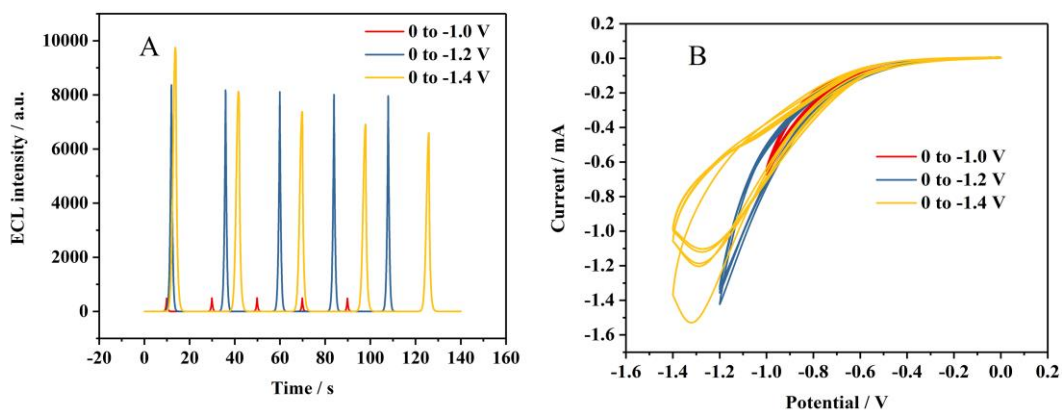

**Fig. S3** The (A) ECL-time and (B) CV curves of S-g-C<sub>3</sub>N<sub>4</sub> NSs at different scanning potential range with 100 mM K<sub>2</sub>S<sub>2</sub>O<sub>8</sub> at pH 7.4 PBS. Scan rate, 100 mV s<sup>-1</sup>.

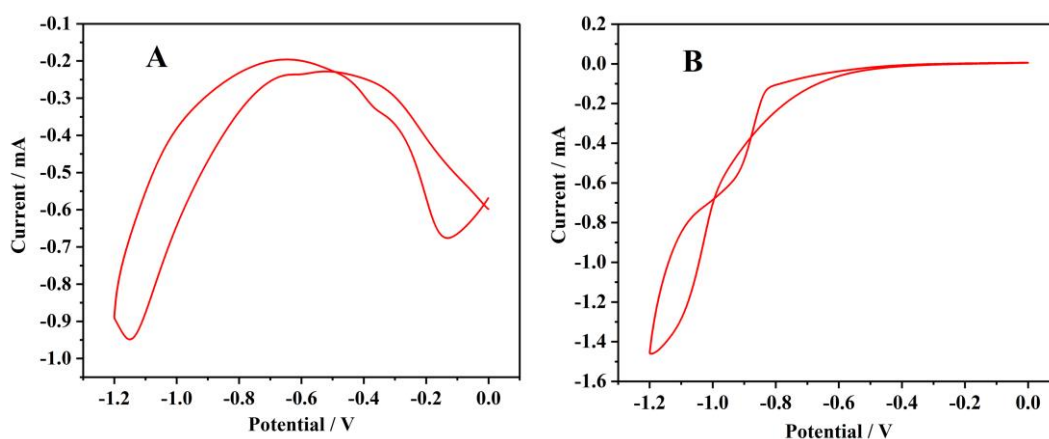

**Fig. S4** The CV curves of S-g-C<sub>3</sub>N<sub>4</sub> NSs in the presence of 50 μM (A) Hg<sup>2+</sup> and (B) Cd<sup>2+</sup> at the scanning potential from 0 to -1.2 V containing 100 mM K<sub>2</sub>S<sub>2</sub>O<sub>8</sub> at pH 7.4 PBS. Scan rate, 100 mV s<sup>-1</sup>.

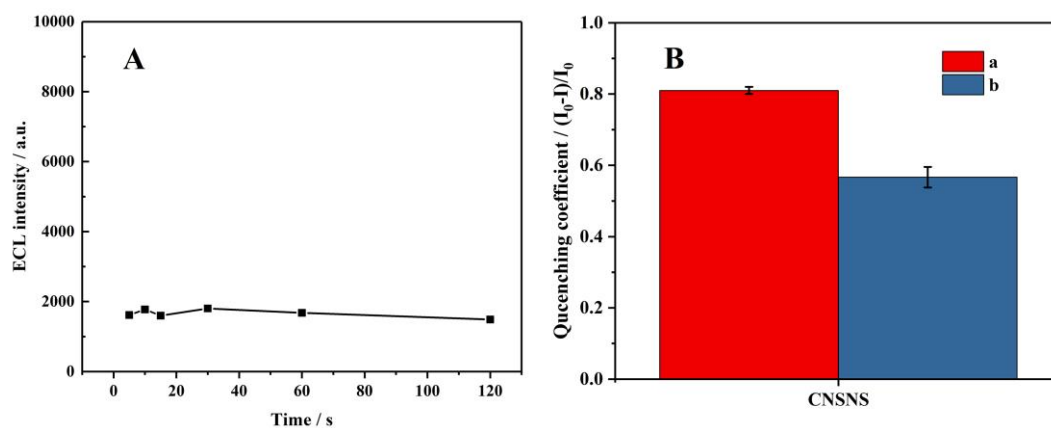

**Fig. S5** (A) The ECL responses of different reaction time between 50  $\mu\text{M}$   $\text{Cu}^{2+}$  and S-g- $\text{C}_3\text{N}_4$  NSs. (B) The quenching coefficient of the two ways of adding copper ions.

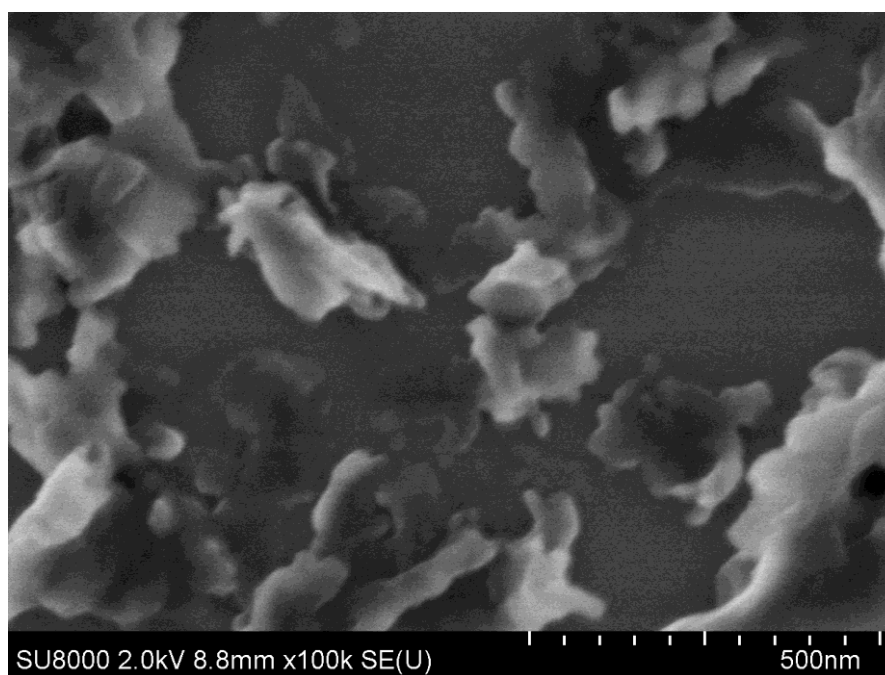

**Fig. S6** SEM image of S-g- $\text{C}_3\text{N}_4$  NSs after long-term use.

**Table S1** The atomic content of C, N, O, S and C/N for g-C<sub>3</sub>N<sub>4</sub> NSs and S-g-C<sub>3</sub>N<sub>4</sub> NSs.

| Atomic %                              | C     | N     | O    | S    | C/N  |
|---------------------------------------|-------|-------|------|------|------|
| g-C <sub>3</sub> N <sub>4</sub> NSs   | 44.98 | 50.39 | 4.63 | 0    | 0.89 |
| S-g-C <sub>3</sub> N <sub>4</sub> NSs | 42.28 | 49.73 | 6.40 | 1.59 | 0.85 |

**Table S2** The fluorescence quantum yield ( $\Phi_p$ ) of g-C<sub>3</sub>N<sub>4</sub> NSs and S-g-C<sub>3</sub>N<sub>4</sub> NSs.

|                            | Quinine sulfate      | g-C <sub>3</sub> N <sub>4</sub> NSs | S-g-C <sub>3</sub> N <sub>4</sub> NSs |
|----------------------------|----------------------|-------------------------------------|---------------------------------------|
| <b>Grad</b>                | 3.48*10 <sup>9</sup> | 7.40*10 <sup>8</sup>                | 6.15*10 <sup>8</sup>                  |
| <b><math>\Phi_p</math></b> | 54%                  | 11.5%                               | 9.5%                                  |
